# Supplementary material
Source: PubMed Central journal article supplement (PMC3118934)

**Supplementary Information**

**to**

**Persistence and Repair of Bifunctional DNA Adducts in Tissues  
of Laboratory Animals Exposed to 1,3-Butadiene by Inhalation**

**by**

Melissa Goggin, Dewakar Sangaraju, Vernon E. Walker, Jeffrey Wickliffe, James A.  
Swenberg, and Natalia Tretyakova

**Figure S-1.** Kinetic analysis of the removal of racemic (*S,S* + *R,R*) and *meso bis*-N7G-BD adducts from mouse liver DNA following treatment of B6C3F1 mice with 625 ppm 1,3 butadiene by inhalation for ten days.

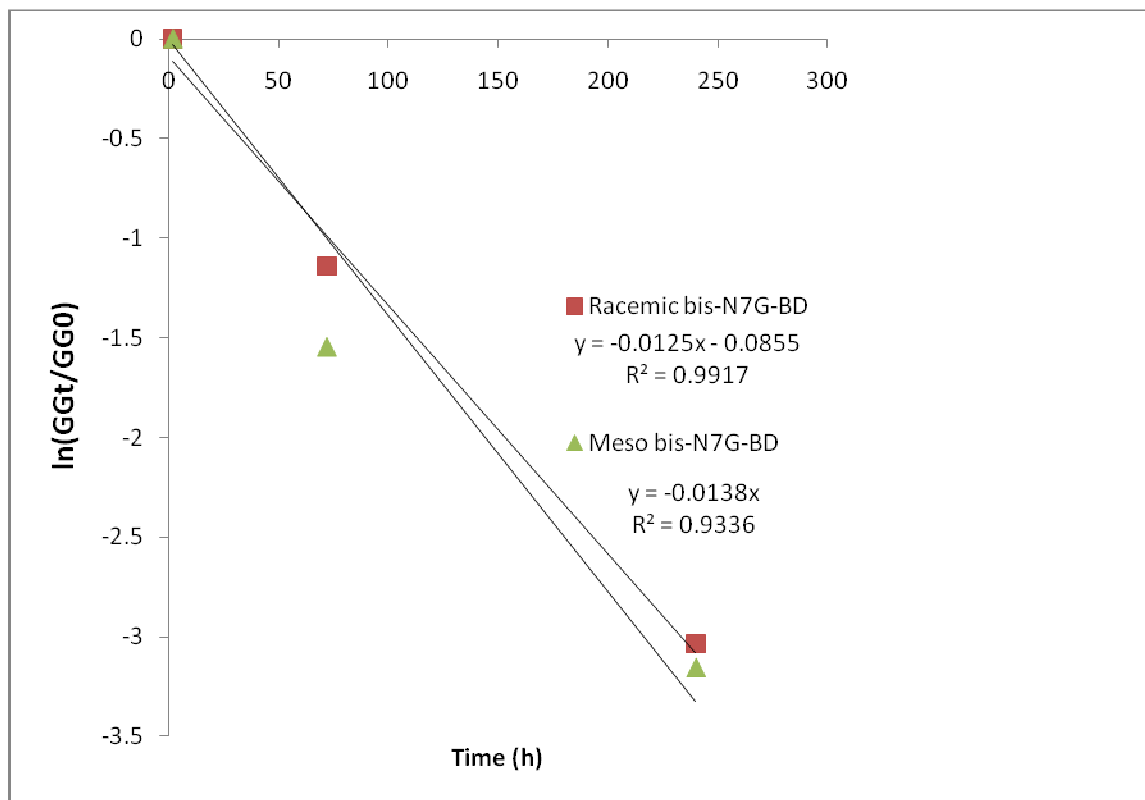

**Figure S-2.** Kinetic analysis of the removal of N7G-N1A-BD adducts from mouse liver DNA following treatment of B6C3F1 mice with 625 ppm 1,3 butadiene by inhalation for ten days.

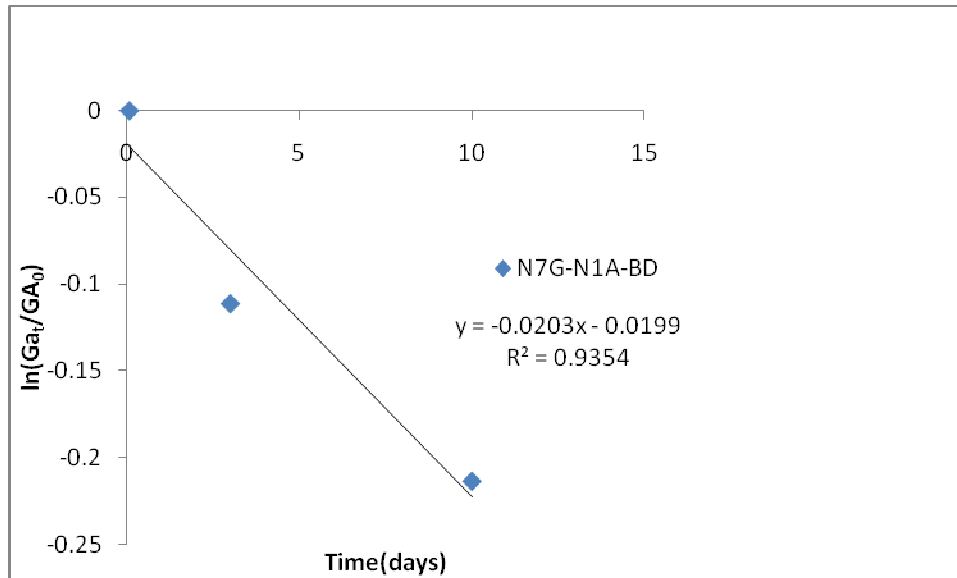

**Figure S-3.** Kinetic analysis of the removal of 1,N<sup>6</sup>-HMHP-dA adducts from mouse liver DNA following treatment of B6C3F1 mice with 625 ppm 1,3 butadiene by inhalation for ten days.

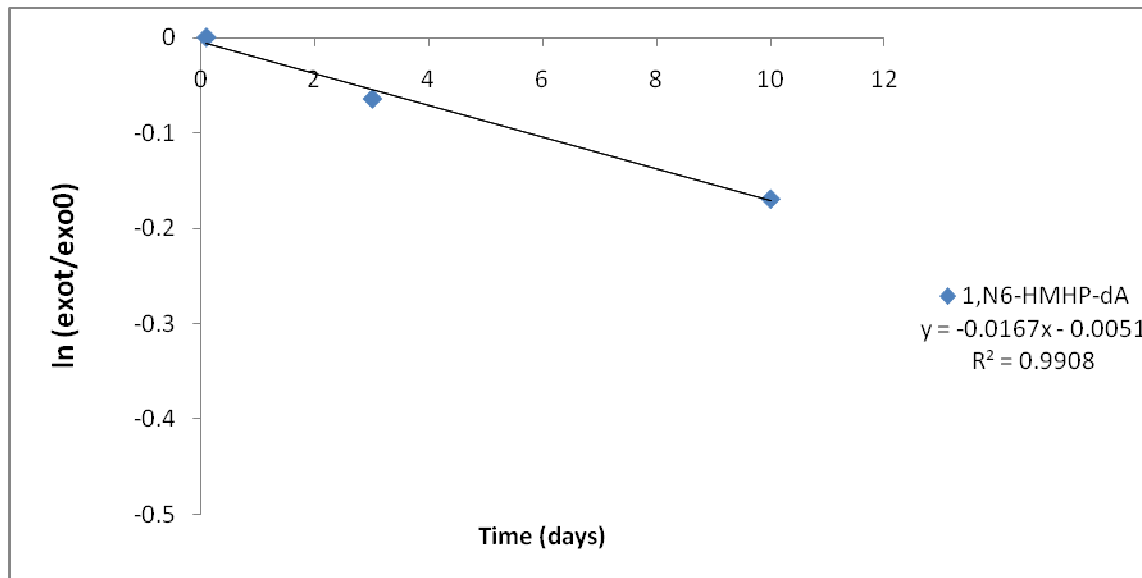

**Figure S-4.** Kinetic analysis of the removal of racemic (*S,S* + *R,R*) and *meso* bis-N7G-BD adducts from mouse kidney following treatment of B6C3F1 mice with 625 ppm 1,3 butadiene by inhalation for ten days.

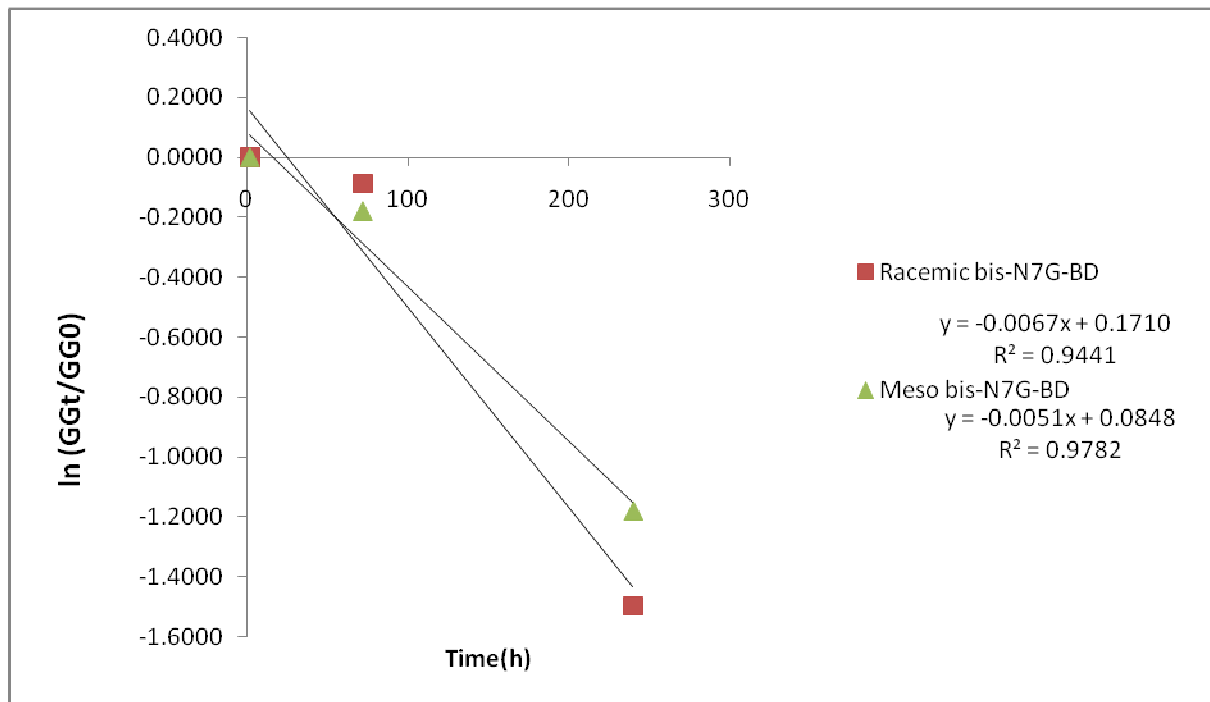

**Figure S-5.** Kinetic analysis of the removal of N7G-N1A-BD adducts from mouse kidney following treatment of B6C3F1 mice with 625 ppm 1,3 butadiene by inhalation for ten days.

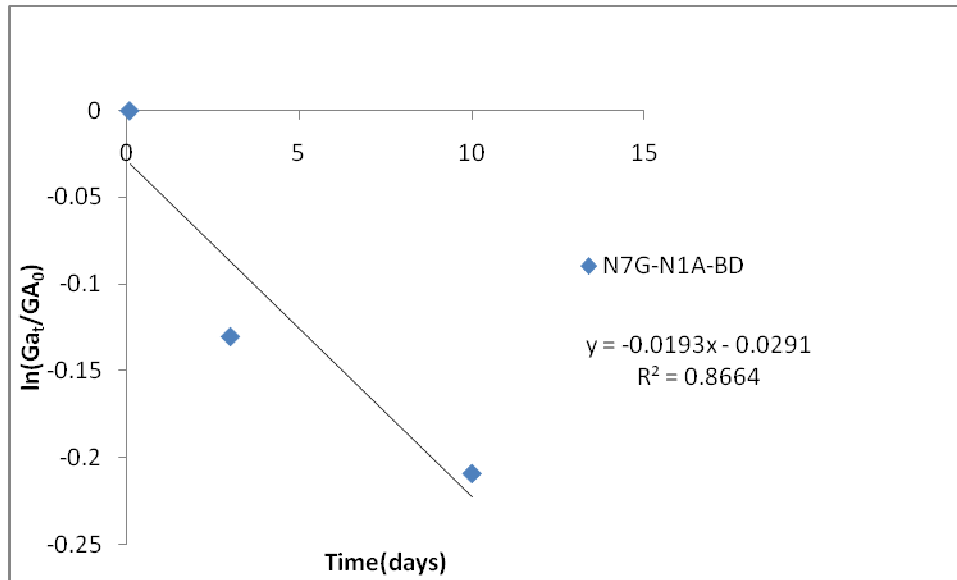

**Figure S-6.** Kinetic analysis of the removal of 1,N<sup>6</sup>-HMHP-dA adducts from mouse kidney DNA following treatment of B6C3F1 mice with 625 ppm 1,3 butadiene by inhalation for ten days.

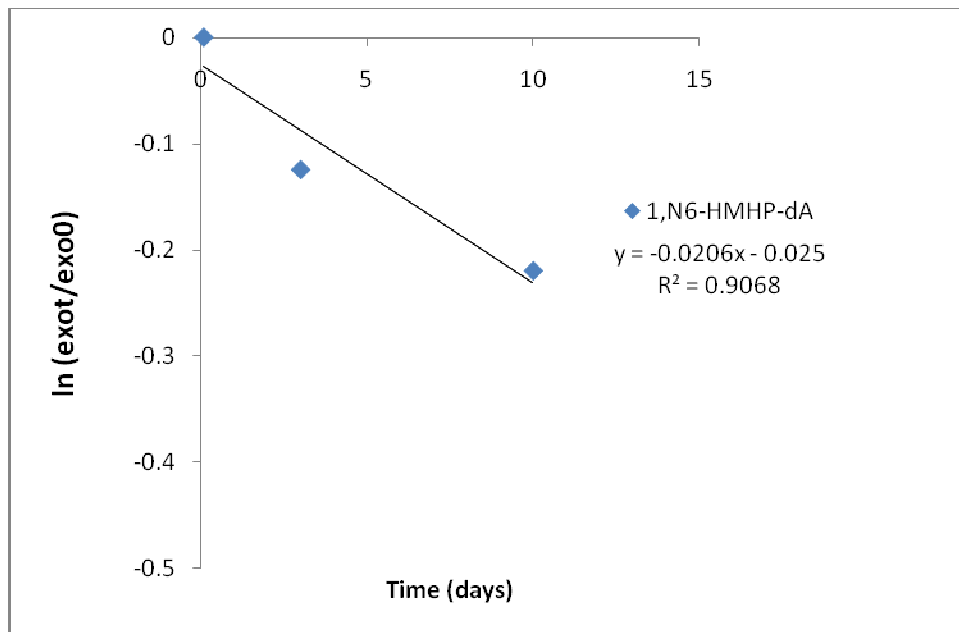

**Figure S-7.** Kinetic analysis of the removal of racemic (*S,S* + *R,R*) *bis*-N7G-BD adducts from mouse lung following treatment of B6C3F1 mice with 625 ppm 1,3 butadiene by inhalation for ten days.

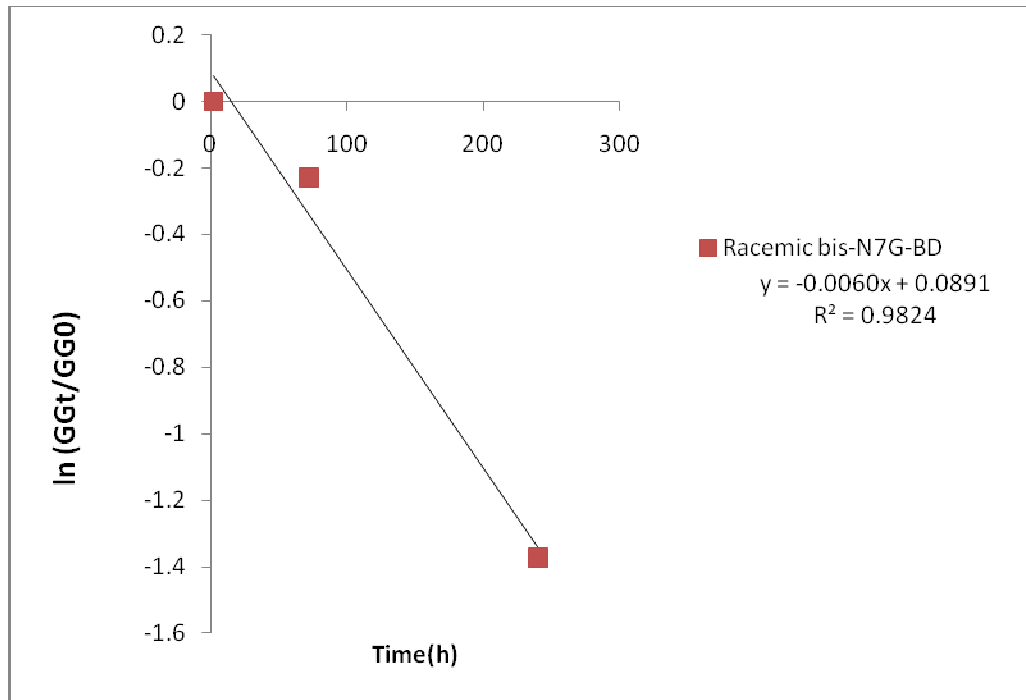



**Figure S-8.** Kinetic analysis of the removal of N7G-N1A-BD adducts from mouse lung following treatment of B6C3F1 mice with 625 ppm 1,3 butadiene by inhalation for ten days.

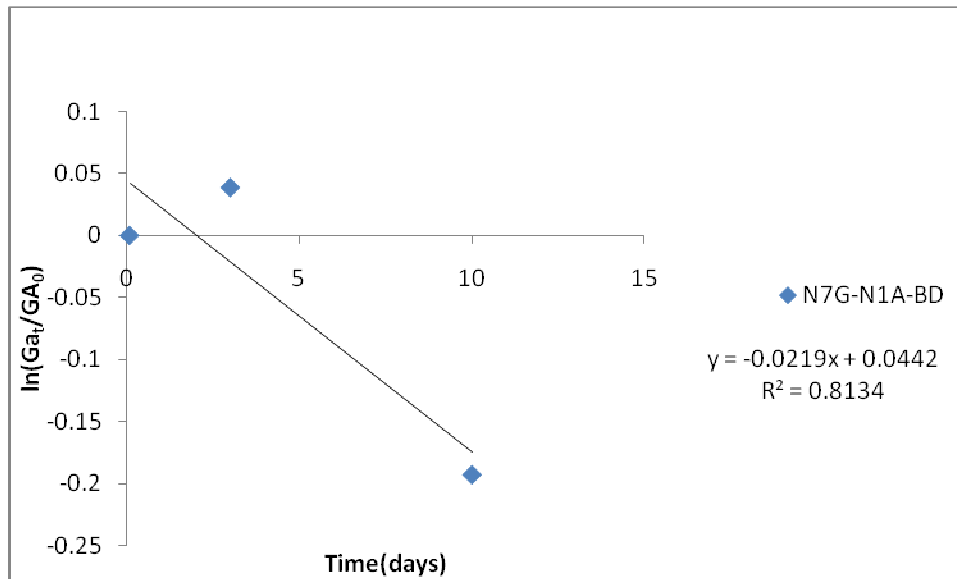

**Figure S-9.** Kinetic analysis of the removal of racemic (*S,S* + *R,R*) *bis*-N7G-BD adducts from rat liver DNA following treatment of F344 rats with 1250 ppm 1,3 butadiene by inhalation for ten days.

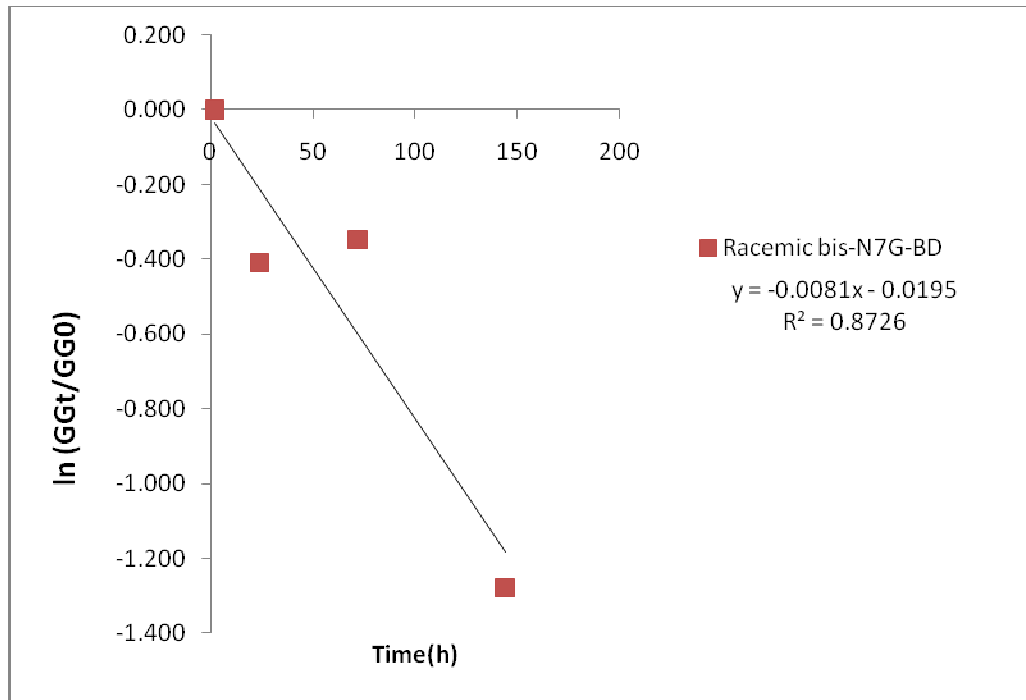

Supplement: NIHMS288835-supplement-1_si_001.pdf [file NIHMS288835-supplement-1_si_001.pdf]
